# Supplementary material for: February 2017 extreme Saharan dust outbreak in the Iberian Peninsula: from lidar-derived optical properties to evaluation of forecast models
Source: Copernicus journal article supplement (doi:10.5194/acp-2018-370), 2018-05-02
Supplement: Supplementary file 1 [file acp-2018-370-supplement.pdf]

## Supplementary material

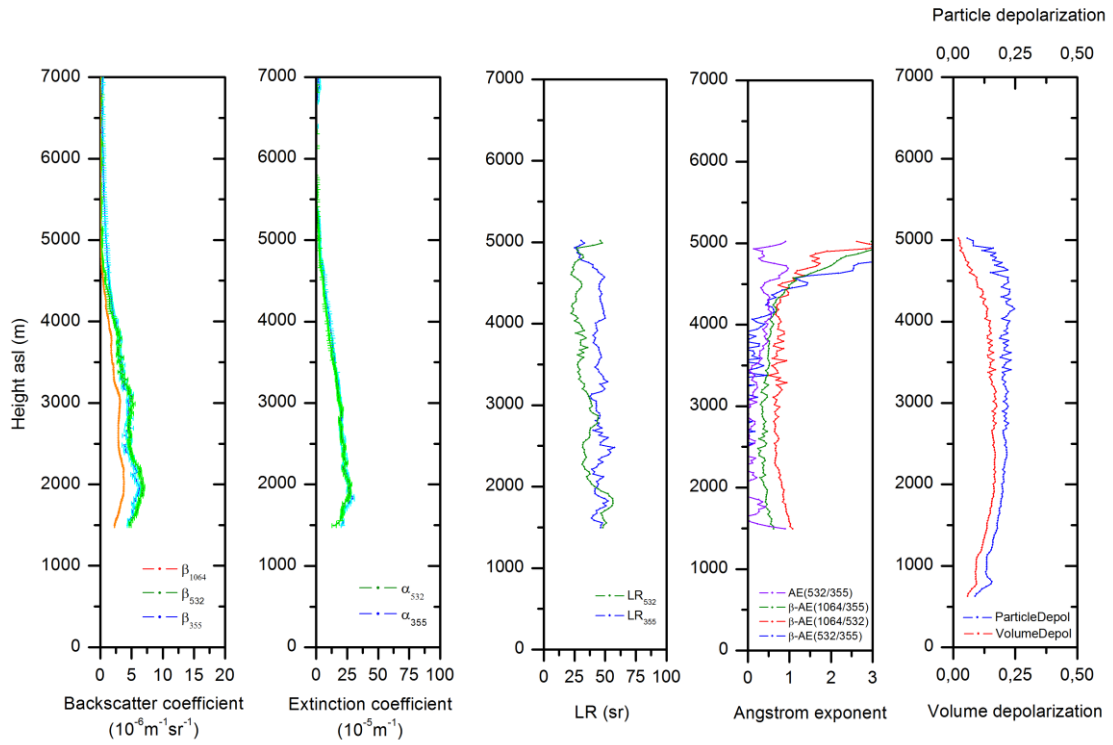

**Fig. S1. Backscatter coefficient, extinction coefficient, lidar ratio, Ångström exponents and particle and volume depolarization profiles at 00:00 UTC on 22, February 2017 at Évora.**

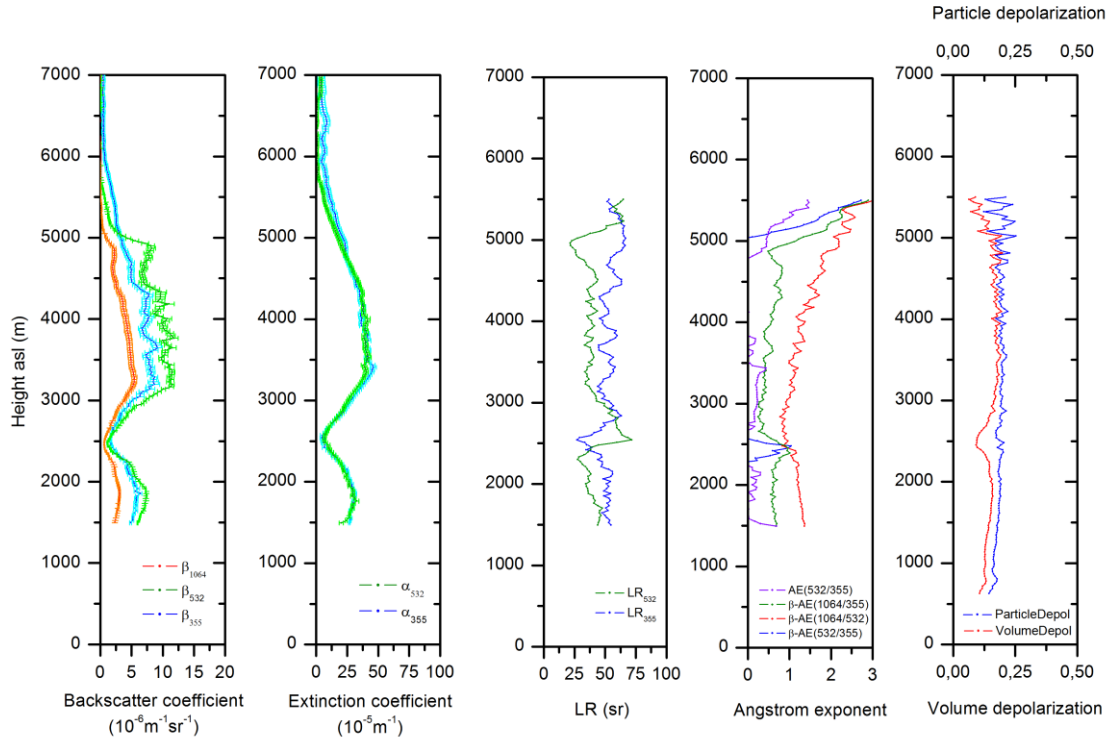

**Fig. S2. Backscatter coefficient, extinction coefficient, lidar ratio, Ångström exponents and particle and volume depolarization profiles at 00:00 UTC on 23, February 2017 at Évora.**

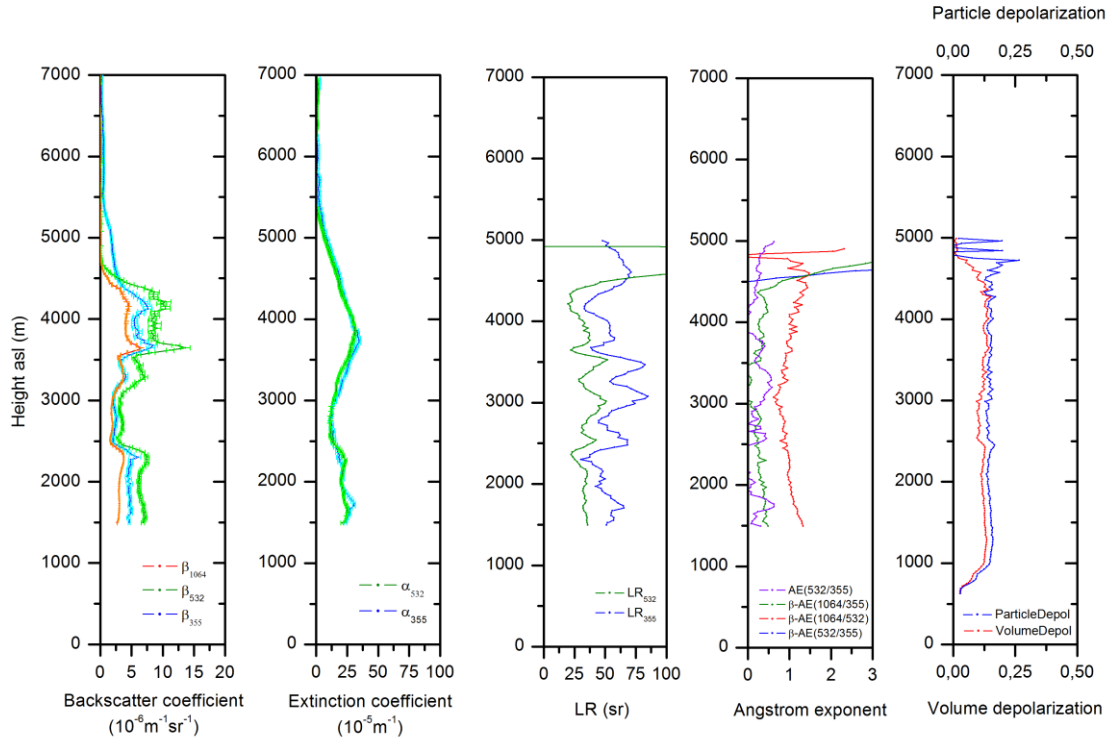

**Fig. S3. Backscatter coefficient, extinction coefficient, lidar ratio, Ångström exponents and particle and volume depolarization profiles at 23:29 UTC on 23, February 2017 at Évora.**

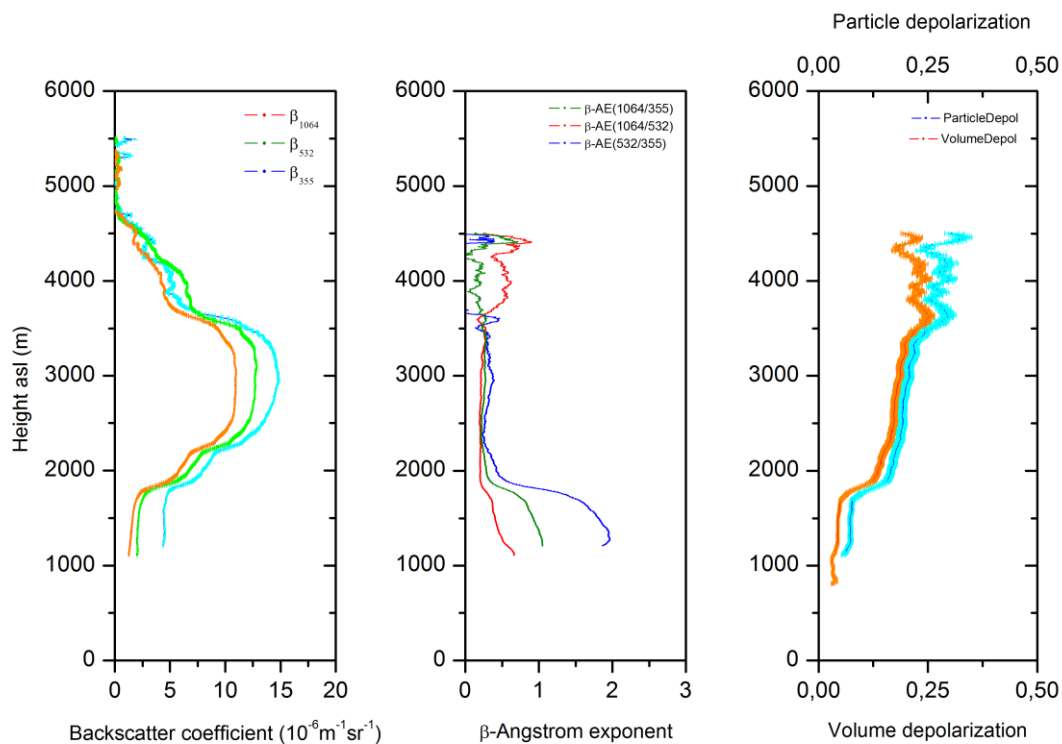

**Fig. S4. Backscatter coefficient,  $\beta$ -Ångström exponent, particle and volume depolarization profiles at 13:30 UTC on 20 February 2017 at Granada.**

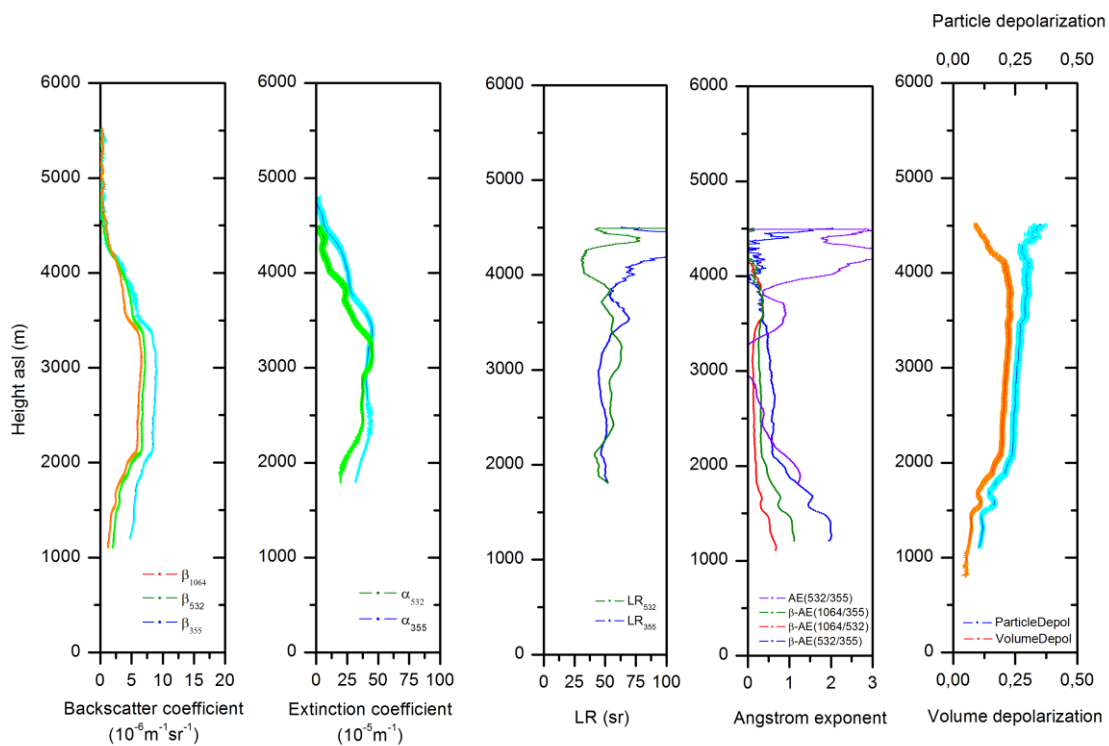

**Fig. S5. Backscatter coefficient, extinction coefficient, lidar ratio, Ångström exponents and particle and volume depolarization profiles at 20:00 UTC on 20, February 2017 at Granada.**

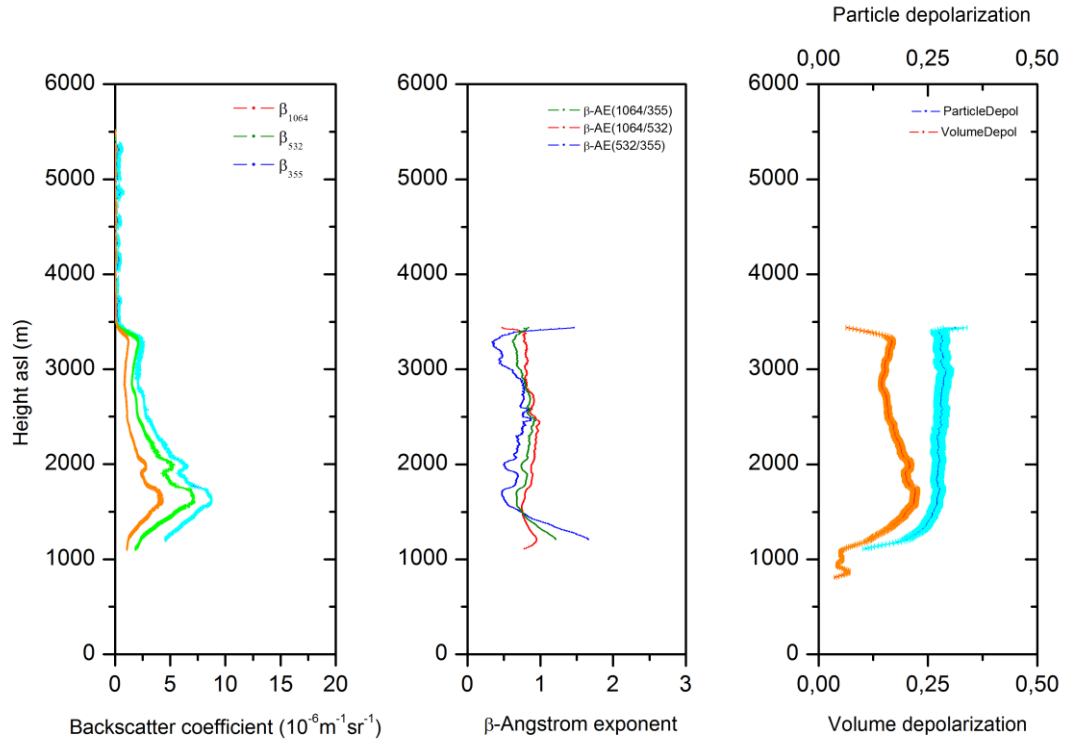

**Fig. S6. Backscatter coefficient,  $\beta$ -Ångström exponent, particle and volume depolarization profiles at 07:31 UTC on 21 February 2017 at Granada.**

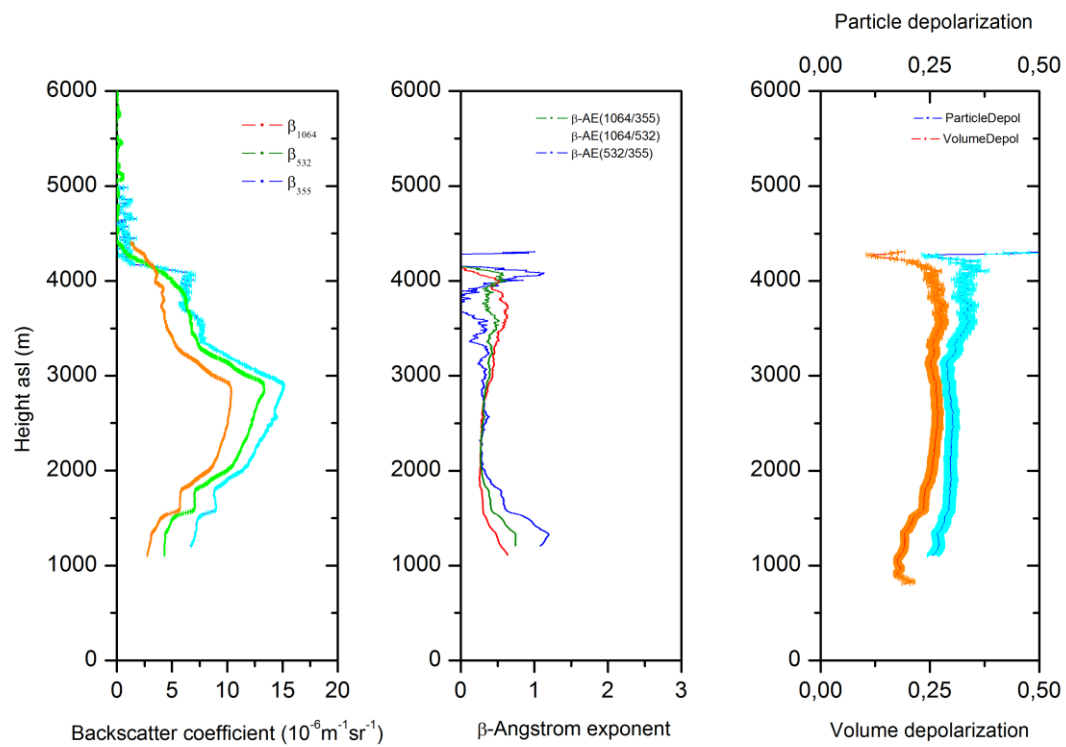

**Fig. S7. Backscatter coefficient,  $\beta$ -Ångström exponent, particle and volume depolarization profiles at 12:30 UTC on 22 February 2017 at Granada.**
